# Supplementary material for: Calibration and standardization of extracellular vesicle measurements by flow cytometry for translational prostate cancer research
Source: Royal Society of Chemistry journal article supplement (doi:10.1039/d2nr01160c), 2022-01-01
Supplement: d2nr01160c1.xlsx [file d2nr01160c1.xlsx]

## Sheet: IRB19-006675 BPH
				Plasma Sample Data				Urine Sample Data
Patient ID	Age	Gleason Score (0 = benign; 1 = 3+3; 2 = 3+4; 3 = 4+3; 4 = 4+4; 5 = 5+4; 6 = 4+5; 7 = other; 8 = 5+5)	PSA at Most Recent Biopsy	Plasma PSMA EV Concentration (EVs/mL)	Plasma STEAP1 EV Concentration (EVs/mL)	Pre-staining Sample Dilution Factor	Related FCS File	Urine PSMA EV Concentration (EVs/mL)	Urine STEAP1 EV Concentration (EVs/mL)	Related FCS File	Pre-staining Sample Dilution Factor
003	54	0	6.7	4.02271e+06	2.9854e+06	1:4	Sample_210413_13396_A7_0.fcs Sample_210413_13397_A8_0.fcs Sample_210413_13398_A9_0.fcs	28200000	18600000	Sample_210616_13920_A8_0.fcs Sample_210616_13921_A9_0.fcs Sample_210616_13922_A10_0.fcs	1:1
004	59	0	11.5	3.6983e+06	2.20438e+06	1:4	Sample_210413_13401_B1_0.fcs Sample_210413_13402_B2_0.fcs Sample_210413_13403_B4_0.fcs	4910000	13100000	Sample_210616_13925_B1_0.fcs Sample_210616_13926_B2_0.fcs Sample_210616_13927_B3_0.fcs	1:1
005	63	0	3.9	3.76318e+06	2.30292e+06	1:4	Sample_210413_13404_B4_0.fcs Sample_210413_13405_B5_0.fcs Sample_210413_13406_B6_0.fcs	7890000	36200000	Sample_210616_13928_B4_0.fcs Sample_210616_13929_B5_0.fcs Sample_210616_13930_B6_0.fcs	1:1
007	64	0	5	5.41768e+06	3.4708e+06	1:4	Sample_210413_13412_C1_0.fcs Sample_210413_13413_C2_0.fcs Sample_210413_13414_C3_0.fcs	15500000	18400000	Sample_210616_13936_C1_0.fcs Sample_210616_13937_C2_0.fcs Sample_210616_13938_C3_0.fcs	1:1
009	73	0	12.1	1.58962e+06	2.38321e+06	1:4	Sample_210413_13418_C7_0.fcs Sample_210413_13419_C8_0.fcs Sample_210413_13420_C9_0.fcs	3520000	5410000	Sample_210616_13942_C7_0.fcs Sample_210616_13943_C8_0.fcs Sample_210616_13944_C9_0.fcs	1:1
010	58	0	10.6	7.25061e+06	2.33577e+06	1:4	Sample_210413_13423_D1_0.fcs Sample_210413_13424_D2_0.fcs Sample_210413_13425_D3_0.fcs	280000	6460000	Sample_210616_13947_D1_0.fcs Sample_210616_13948_D2_0.fcs Sample_210616_13949_D3_0.fcs	1:1
013	65	0	4.1	3.11436e+06	3.16423e+06	1:4	Sample_210413_13429_D7_0.fcs Sample_210413_13430_D8_0.fcs Sample_210413_13431_D9_0.fcs	1850000	2710000	Sample_210616_13958_E1_0.fcs Sample_210616_13959_E2_0.fcs Sample_210616_13960_E3_0.fcs	1:1
021	57	0	9.9	2.14112e+06	1.60584e+06	1:4	Sample_210413_13451_F7_0.fcs Sample_210413_13452_F8_0.fcs Sample_210413_13453_F9_0.fcs	1610000	2930000	Sample_210616_13986_G7_0.fcs Sample_210616_13987_G8_0.fcs Sample_210616_13988_G9_0.fcs	1:1
027	55	0	6.8	3.55231e+06	1.0073e+07	1:4	Sample_210415_13438_A4_0.fcs Sample_210415_13439_A5_0.fcs Sample_210415_13440_A6_0.fcs	1770000	5610000	Sample_210617_13925_A7_0.fcs Sample_210617_13926_A8_0.fcs Sample_210617_13927_A9_0.fcs	1:1
030	42	0	5.1	5.9043e+06	1.0365e+07	1:4	Sample_210415_13449_B4_0.fcs Sample_210415_13450_B5_0.fcs Sample_210415_13451_B6_0.fcs	880000	6790000	Sample_210617_13936_B7_0.fcs Sample_210617_13937_B8_0.fcs Sample_210617_13938_B9_0.fcs	1:1
036	64	0	8.8	6.00552e+08	4.74453e+08	1:4	Sample_210415_13435_A1_0.fcs Sample_210415_13436_A2_0.fcs Sample_210415_13437_A3_0.fcs	1190000	2180000	Sample_210617_13958_D7_0.fcs Sample_210617_13959_D8_0.fcs Sample_210617_13960_D9_0.fcs	1:1
045	64	0	6.6	2.87105e+06	6.13139e+06	1:4	Sample_210415_13496_F7_0.fcs Sample_210415_13497_F8_0.fcs Sample_210415_13498_F9_0.fcs	3720000	9180000	Sample_210617_13991_G7_0.fcs Sample_210617_13992_G8_0.fcs Sample_210617_13993_G9_0.fcs	1:1
046	61	0	17.6	1.11922e+06	5000000	1:4	Sample_210415_13501_G1_0.fcs Sample_210415_13502_G2_0.fcs Sample_210415_13503_G3_0.fcs	1480000	3490000	Sample_210617_13996_H1_0.fcs Sample_210617_13997_H2_0.fcs Sample_210617_13998_H3_0.fcs	1:1
047	56	0	6.5	2.2871e+06	4.92701e+06	1:4	Sample_210415_13504_G4_0.fcs Sample_210415_13505_G5_0.fcs Sample_210415_13506_G6_0.fcs	3300000	5610000	Sample_210617_13999_H4_0.fcs Sample_210617_14000_H5_0.fcs Sample_210617_14001_H6_0.fcs	1:1
052	63	0	4	1.6545e+06	8.94161e+06	1:4	Sample_210419_13466_A1_0.fcs Sample_210419_13467_A2_0.fcs Sample_210419_13468_A3_0.fcs	11800000	8350000	Sample_210618_13944_B1_0.fcs Sample_210618_13945_B2_0.fcs Sample_210618_13946_B3_0.fcs	1:1
061	63	0	5	5.40146e+06	4.23358e+06	1:4	Sample_210419_13499_D1_0.fcs Sample_210419_13500_D2_0.fcs Sample_210419_13501_D3_0.fcs	17200000	14300000	Sample_210618_13980_E4_0.fcs Sample_210618_13981_E5_0.fcs Sample_210618_13982_E6_0.fcs	1:1
065	56	0	9.5	5.69343e+06	7.26277e+06	1:4	Sample_210419_13513_E4_0.fcs Sample_210419_13514_E5_0.fcs Sample_210419_13515_E6_0.fcs	16100000	9300000	Sample_210618_13994_F7_0.fcs Sample_210618_13995_F8_0.fcs Sample_210618_13996_F9_0.fcs	1:1
068	64	0	8.7	1.6545e+06	4.12409e+06	1:4	Sample_210419_13525_F4_0.fcs Sample_210419_13526_F5_0.fcs Sample_210419_13527_F6_0.fcs	17000000	7760000	Sample_210618_14005_G7_0.fcs Sample_210618_14006_G8_0.fcs Sample_210618_14007_G9_0.fcs	1:1
078	71	0	4	1.94647e+06	1.31387e+07	1:4	Sample_210420_13478_A4_0.fcs Sample_210420_13479_A5_0.fcs Sample_210420_13480_A6_0.fcs	1850000	3910000	Sample_210621_13966_B7_0.fcs Sample_210621_13967_B8_0.fcs Sample_210621_13968_B9_0.fcs	1:1
083	65	0	6.9	5.83942e+06	1.14964e+07	1:4	Sample_210420_13497_C1_0.fcs Sample_210420_13498_C2_0.fcs Sample_210420_13499_C3_0.fcs	7190000	12900000	"Sample_210621_13985_D4_0.fcs Sample_210621_13986_D5_0.fcs Sample_210621_13987_D6_0.fcs"	1:1
085	62	0	3.7	1.54745e+07	1.94161e+07	1:4	Sample_210420_13503_C7_0.fcs Sample_210420_13504_C8_0.fcs Sample_210420_13505_C9_0.fcs	4390000	11800000	"Sample_210621_13993_E1_0.fcs Sample_210621_13994_E2_0.fcs Sample_210621_13995_E3_0.fcs"	1:1
086	56	0	7.9	3.74696e+06	1.06204e+07	1:4	Sample_210420_13508_D1_0.fcs Sample_210420_13509_D2_0.fcs Sample_210420_13510_D3_0.fcs	7250000	16500000	"Sample_210621_13996_E4_0.fcs Sample_210621_13997_E5_0.fcs Sample_210621_13998_E6_0.fcs"	1:1
088	59	0	4.7	1.72749e+07	1.59124e+07	1:4	Sample_210420_13514_D7_0.fcs Sample_210420_13515_D8_0.fcs Sample_210420_13516_D9_0.fcs	5880000	12000000	Sample_210621_14004_F1_0.fcs Sample_210621_14005_F2_0.fcs Sample_210621_14006_F3_0.fcs	1:1
090	74	0	5.6	9.24574e+06	1.66423e+07	1:4	Sample_210420_13522_E4_0.fcs Sample_210420_13523_E5_0.fcs Sample_210420_13524_E6_0.fcs	4180000	6410000	"Sample_210621_14010_F7_0.fcs Sample_210621_14011_F8_0.fcs Sample_210621_14012_F9_0.fcs"	1:1
091	65	0	6	6.13139e+06	1.34307e+07	1:4	Sample_210420_13525_E7_0.fcs Sample_210420_13526_E8_0.fcs Sample_210420_13527_E9_0.fcs	13200000	18600000	"Sample_210621_14015_G1_0.fcs Sample_210621_14016_G2_0.fcs Sample_210621_14017_G3_0.fcs"	1:1
096	57	0	5.8	6.32603e+06	1.34672e+07	1:4	Sample_210420_13544_G4_0.fcs Sample_210420_13545_G5_0.fcs Sample_210420_13546_G6_0.fcs	39800000	33200000	Sample_210621_13949_A1_0.fcs Sample_210621_13950_A2_0.fcs Sample_210621_13951_A3_0.fcs	1:1
097	50	0	10	1.62667e+07	1.26642e+07	1:4	Sample_210420_13547_G7_0.fcs Sample_210420_13548_G8_0.fcs Sample_210420_13549_G9_0.fcs	5300000	9280000	Sample_210621_13952_A4_0.fcs Sample_210621_13953_A5_0.fcs Sample_210621_13954_A6_0.fcs	1:1
099	68	0	13.1	2.33577e+06	6.09489e+06	1:4	Sample_210420_13555_H4_0.fcs Sample_210420_13556_H5_0.fcs Sample_210420_13557_H6_0.fcs	1280000	4780000	Sample_210621_13960_B1_0.fcs Sample_210621_13961_B2_0.fcs Sample_210621_13962_B3_0.fcs	1:1
100	72	0	7.26	1.80049e+06	4.19708e+06	1:4	Sample_210420_13558_H7_0.fcs Sample_210420_13559_H8_0.fcs Sample_210420_13560_H9_0.fcs	86900000	84800000	Sample_210621_13963_B4_0.fcs Sample_210621_13964_B5_0.fcs Sample_210621_13965_B6_0.fcs	1:1
102	76	0	4.9	3.11436e+06	9.92701e+06	1:4	Sample_210421_13484_A4_0.fcs Sample_210421_13485_A5_0.fcs Sample_210421_13486_A6_0.fcs	5570000	6200000	Sample_210621_13971_C1_0.fcs Sample_210621_13972_C2_0.fcs Sample_210621_13973_C3_0.fcs	1:1
108	62	0	11.3	8.71046e+06	1.0219e+07	1:4	Sample_210421_13506_C4_0.fcs Sample_210421_13507_C5_0.fcs Sample_210421_13508_C6_0.fcs	1850000	4590000	Sample_210621_13993_E1_0.fcs Sample_210621_13994_E2_0.fcs Sample_210621_13995_E3_0.fcs	1:1
112	57	0	9.9	2.56285e+06	3.75912e+06	1:4	Sample_210421_13517_D3_0.fcs Sample_210421_13518_D4_0.fcs Sample_210421_13519_D5_0.fcs	27900000	20800000	Sample_210621_14007_F4_0.fcs Sample_210621_14008_F5_0.fcs Sample_210621_14009_F6_0.fcs	1:1
115	64	0	6.4	1.16302e+07	7.91971e+06	1:4	Sample_210421_13528_E4_0.fcs Sample_210421_13529_E5_0.fcs Sample_210421_13530_E6_0.fcs	50700000	41600000	Sample_210621_14018_G4_0.fcs Sample_210621_14019_G5_0.fcs Sample_210621_14020_G6_0.fcs	1:1
123	61	0	1	1.75182e+06	4.92701e+06	1:4	Sample_210421_13558_H1_0.fcs Sample_210421_13559_H2_0.fcs Sample_210421_13560_H3_0.fcs	620000	3090000	Sample_210616_13950_D4_0.fcs Sample_210616_13951_D5_0.fcs Sample_210616_13952_D6_0.fcs	1:1
125	53	0	8.8	6.52068e+06	3.94161e+06	1:4	Sample_210421_13564_H7_0.fcs Sample_210421_13565_H8_0.fcs Sample_210421_13566_H9_0.fcs	1970000	3360000	Sample_210616_13964_E7_0.fcs Sample_210616_13965_E8_0.fcs Sample_210616_13966_E9_0.fcs	1:1

## Sheet: IRB19-006675 Localized PCa
				Plasma Sample Data				Urine Sample Data
Patient ID	Age	Gleason Score (0 = benign; 1 = 3+3; 2 = 3+4; 3 = 4+3; 4 = 4+4; 5 = 5+4; 6 = 4+5; 7 = other; 8 = 5+5)	PSA at Most Recent Biopsy	Plasma PSMA EV Concentration (EVs/mL)	Plasma STEAP1 EV Concentration (EVs/mL)	Pre-staining Sample Dilution Factor	Related FCS File	Urine PSMA EV Concentration (EVs/mL)	Urine STEAP1 EV Concentration (EVs/mL)	Related FCS File	Pre-staining Sample Dilution Factor
001	66	1	3.9	1.54002e+06	1.90578e+06	1:3	Sample_210413_13390_A1_0.fcs, Sample_210413_13391_A2_0.fcs, Sample_210413_13392_A3_0.fcs	1770000	2420000	Sample_210616_13914_A2_0.fcs Sample_210616_13915_A3_0.fcs Sample_210616_13916_A4_0.fcs	1:1
002	68	2	15.5	3.99865e+06	3.86018e+06	1:3	Sample_210413_13393_A4_0.fcs, Sample_210413_13394_A4_0.fcs, Sample_210413_13395_A6_0.fcs	3160000	73200000	Sample_210616_13917_A5_0.fcs Sample_210616_13918_A6_0.fcs Sample_210616_13919_A7_0.fcs	1:1
006	62	2	5.3	1.56704e+06	2.56535e+06	1:3	Sample_210413_13407_B7_0.fcs Sample_210413_13408_B8_0.fcs Sample_210413_13409_B9_0.fcs	5660000	11200000	Sample_210616_13931_B7_0.fcs Sample_210616_13932_B8_0.fcs Sample_210616_13933_B9_0.fcs	1:1
008	72	2	17.6	1.83722e+06	2.95745e+06	1:3	Sample_210413_13415_C4_0.fcs Sample_210413_13416_C5_0.fcs Sample_210413_13417_C6_0.fcs	10400000	17300000	Sample_210616_13939_C4_0.fcs Sample_210616_13940_C5_0.fcs Sample_210616_13941_C6_0.fcs	1:1
012	86	3	5.2	2.5667e+06	3.43465e+06	1:3	Sample_210413_13426_D4_0.fcs Sample_210413_13427_D5_0.fcs Sample_210413_13428_D6_0.fcs	1630000	2070000	Sample_210616_13953_D7_0.fcs Sample_210616_13954_D8_0.fcs Sample_210616_13955_D9_0.fcs	1:1
014	70	2	2.8	1.58055e+06	2.83587e+06	1:3	Sample_210413_13434_E1_0.fcs Sample_210413_13435_E2_0.fcs Sample_210413_13436_E3_0.fcs	880000	1350000	Sample_210616_13961_E4_0.fcs Sample_210616_13962_E5_0.fcs Sample_210616_13963_E6_0.fcs	1:1
016	76	4	12	2.91793e+06	1.90578e+06	1:3	Sample_210413_13437_E4_0.fcs Sample_210413_13438_E5_0.fcs Sample_210413_13439_E6_0.fcs	22500000	19200000	Sample_210616_13969_F1_0.fcs Sample_210616_13970_F2_0.fcs Sample_210616_13971_F3_0.fcs	1:1
017	74	2	19.6	1.49544e+08	1.90578e+06	1:3	Sample_210413_13473_H7_0.fcs Sample_210413_13474_H8_0.fcs Sample_210413_13475_H9_0.fcs	5970000	4510000	Sample_210616_13972_F4_0.fcs Sample_210616_13973_F5_0.fcs Sample_210616_13974_F6_0.fcs	1:1
018	68	3	4.7	1.64809e+06	1.66261e+06	1:3	Sample_210413_13440_E7_0.fcs Sample_210413_13441_E8_0.fcs Sample_210413_13442_E9_0.fcs	3530000	4530000	Sample_210616_13975_F7_0.fcs Sample_210616_13976_F8_0.fcs Sample_210616_13977_F9_0.fcs	1:1
019	50	1	5.8	1.13475e+06	2.71429e+06	1:3	Sample_210413_13445_F1_0.fcs Sample_210413_13446_F2_0.fcs Sample_210413_13447_F3_0.fcs	1250000	3480000	Sample_210616_13980_G1_0.fcs Sample_210616_13981_G2_0.fcs Sample_210616_13982_G3_0.fcs	1:1
020	61	3	3.8	2.06687e+06	1.45897e+06	1:3	Sample_210413_13448_F4_0.fcs Sample_210413_13449_F5_0.fcs Sample_210413_13450_F6_0.fcs	1290000	3820000	Sample_210616_13983_G4_0.fcs Sample_210616_13984_G5_0.fcs Sample_210616_13985_G6_0.fcs	1:1
022	79	1	12.7	4.01216e+06	2.13374e+06	1:3	Sample_210413_13456_G1_0.fcs Sample_210413_13457_G2_0.fcs Sample_210413_13458_G3_0.fcs	2090000	1710000	Sample_210616_13991_H1_0.fcs Sample_210616_13992_H2_0.fcs Sample_210616_13993_H3_0.fcs	1:1
023	69	6	6.48	1.58055e+06	1.21581e+06	1:3	Sample_210413_13459_G4_0.fcs Sample_210413_13460_G5_0.fcs Sample_210413_13461_G6_0.fcs	7500000	6310000	Sample_210616_13994_H4_0.fcs Sample_210616_13995_H5_0.fcs Sample_210616_13996_H6_0.fcs	1:1
024	67	2	5.8	1.25633e+06	2.18845e+06	1:3	Sample_210413_13462_G7_0.fcs Sample_210413_13463_G8_0.fcs Sample_210413_13464_G9_0.fcs	4830000	3110000	Sample_210616_13997_H7_0.fcs Sample_210616_13998_H8_0.fcs Sample_210616_13999_H9_0.fcs	1:1
025	68	1	5.8	3.48531e+06	2.67477e+06	1:3	Sample_210413_13467_H1_0.fcs Sample_210413_13468_H2_0.fcs Sample_210413_13469_H3_0.fcs	580000	1950000	Sample_210617_13919_A1_0.fcs Sample_210617_13920_A2_0.fcs Sample_210617_13921_A3_0.fcs	1:1
026	76	1	9	1.6616e+06	1.66261e+06	1:3	Sample_210413_13470_H4_0.fcs Sample_210413_13471_H5_0.fcs Sample_210413_13472_H6_0.fcs	1570000	2820000	Sample_210617_13922_A4_0.fcs Sample_210617_13923_A5_0.fcs Sample_210617_13924_A6_0.fcs	1:1
028	73	2	6	3.12057e+06	7.29483e+06	1:3	Sample_210415_13441_A7_0.fcs Sample_210415_13442_A8_0.fcs Sample_210415_13443_A9_0.fcs	1130000	7660000	Sample_210617_13930_B1_0.fcs Sample_210617_13931_B2_0.fcs Sample_210617_13932_B3_0.fcs	1:1
029	70	2	14.6	2.43161e+06	6.68693e+06	1:3	Sample_210415_13446_B1_0.fcs Sample_210415_13447_B2_0.fcs Sample_210415_13448_B3_0.fcs	807000	2610000	Sample_210617_13933_B4_0.fcs Sample_210617_13934_B5_0.fcs Sample_210617_13935_B6_0.fcs	1:1
031	63	3	7.8	3.20162e+06	9.63526e+06	1:3	Sample_210415_13452_B7_0.fcs Sample_210415_13451_B8_0.fcs Sample_210415_13454_B9_0.fcs	1890000	5330000	Sample_210617_13941_C1_0.fcs Sample_210617_13942_C2_0.fcs Sample_210617_13943_C3_0.fcs	1:1
033	68	2	8.6	1.74265e+06	4.83283e+06	1:3	Sample_210415_13457_C1_0.fcs Sample_210415_13458_C2_0.fcs Sample_210415_13459_C3_0.fcs	3830000	3930000	Sample_210617_13947_C7_0.fcs Sample_210617_13948_C8_0.fcs Sample_210617_13949_C9_0.fcs	1:1
034	69	2	8.1	3.72847e+06	9.3617e+06	1:3	Sample_210415_13460_C4_0.fcs Sample_210415_13461_C5_0.fcs Sample_210415_13462_C6_0.fcs	4070000	4030000	Sample_210617_13952_D1_0.fcs Sample_210617_13953_D2_0.fcs Sample_210617_13954_D3_0.fcs	1:1
035	68	2	4.6	2.2695e+06	8.66261e+06	1:3	Sample_210415_13463_C7_0.fcs Sample_210415_13464_C8_0.fcs Sample_210415_13465_C9_0.fcs	2160000	4620000	Sample_210617_13955_D4_0.fcs Sample_210617_13956_D5_0.fcs Sample_210617_13957_D6_0.fcs	1:1
037	63	2	7.2	2.63425e+06	1.12766e+07	1:3	Sample_210415_13468_D1_0.fcs Sample_210415_13469_D2_0.fcs Sample_210415_13470_D3_0.fcs	2150000	3820000	Sample_210617_13963_E1_0.fcs Sample_210617_13964_E2_0.fcs Sample_210617_13965_E3_0.fcs	1:1
038	57	2	5.1	1.82736e+08	2.12462e+08	1:3	Sample_210415_13471_D4_0.fcs Sample_210415_13472_D5_0.fcs Sample_210415_13473_D6_0.fcs	1730000	17400000	Sample_210617_13966_E4_0.fcs Sample_210617_13967_E5_0.fcs Sample_210617_13968_E6_0.fcs	1:1
039	63	3	5.7	1.40493e+06	5.83587e+06	1:3	Sample_210415_13474_D7_0.fcs Sample_210415_13475_D8_0.fcs Sample_210415_13476_D9_0.fcs	4390000	14400000	Sample_210617_13969_E7_0.fcs Sample_210617_13970_E8_0.fcs Sample_210617_13971_E9_0.fcs	1:1
040	76	3	5.6	1.86424e+06	6.65653e+06	1:3	Sample_210415_13479_E1_0.fcs Sample_210415_13480_E2_0.fcs Sample_210415_13481_E3_0.fcs	853000	2450000	Sample_210617_13974_F1_0.fcs Sample_210617_13975_F2_0.fcs Sample_210617_13976_F3_0.fcs	1:1
041	61	3	8.3	1.62107e+06	4.77204e+06	1:3	Sample_210415_13482_E4_0.fcs Sample_210415_13483_E5_0.fcs Sample_210415_13484_E6_0.fcs	1400000	3370000	Sample_210617_13977_F4_0.fcs Sample_210617_13978_F5_0.fcs Sample_210617_13979_F6_0.fcs	1:1
042	56	1	4.8	1.58055e+06	5.80547e+06	1:3	Sample_210415_13485_E7_0.fcs Sample_210415_13486_E8_0.fcs Sample_210415_13487_E9_0.fcs	2700000	12400000	Sample_210617_13980_F7_0.fcs Sample_210617_13981_F8_0.fcs Sample_210617_13982_F9_0.fcs	1:1
043	78	3	17.7	1.25633e+06	5.10638e+06	1:3	Sample_210415_13490_F1_0.fcs Sample_210415_13491_F2_0.fcs Sample_210415_13492_F3_0.fcs	387000	11200000	Sample_210617_13985_G1_0.fcs Sample_210617_13986_G2_0.fcs Sample_210617_13987_G3_0.fcs	1:1
044	67	3	13.5	1.70213e+06	5.13678e+06	1:3	Sample_210415_13493_F4_0.fcs Sample_210415_13494_F5_0.fcs Sample_210415_13495_F6_0.fcs	3070000	11100000	Sample_210617_13988_G4_0.fcs Sample_210617_13989_G5_0.fcs Sample_210617_13990_G6_0.fcs	1:1
048	72	3	5.2	1.54002e+06	3.89058e+06	1:3	Sample_210415_13507_G7_0.fcs Sample_210415_13508_G8_0.fcs Sample_210415_13509_G9_0.fcs	3130000	3790000	Sample_210617_14002_H7_0.fcs Sample_210617_14003_H8_0.fcs Sample_210617_14004_H9_0.fcs	1:1
049	61	2	5.2	4.3769e+06	6.56535e+06	1:3	Sample_210415_13512_H1_0.fcs Sample_210415_13513_H2_0.fcs Sample_210415_13514_H3_0.fcs	3480000	5910000	Sample_210618_13934_A1_0.fcs Sample_210618_13935_A2_0.fcs Sample_210618_13936_A3_0.fcs	1:1
050	55	4	5.8	3.97163e+06	9.81763e+06	1:3	Sample_210415_13515_H4_0.fcs Sample_210415_13516_H5_0.fcs Sample_210415_13517_H6_0.fcs	1400000	2160000	Sample_210618_13937_A4_0.fcs Sample_210618_13938_A5_0.fcs Sample_210618_13939_A6_0.fcs	1:1
051	58	1	8.3	4.33637e+06	7.53799e+06	1:3	Sample_210415_13518_H7_0.fcs Sample_210415_13519_H8_0.fcs Sample_210415_13520_H9_0.fcs	14600000	17100000	Sample_210618_13940_A7_0.fcs Sample_210618_13941_A8_0.fcs Sample_210618_13942_A9_0.fcs	1:1
053	66	2	4.9	8.79433e+06	4.04255e+06	1:3	Sample_210419_13469_A4_0.fcs Sample_210419_13470_A5_0.fcs Sample_210419_13471_A6_0.fcs	7030000	6750000	Sample_210618_13947_B4_0.fcs Sample_210618_13948_B5_0.fcs Sample_210618_13949_B6_0.fcs	1:1
054	67	2	6.4	1.17798e+07	5.22796e+06	1:3	Sample_210419_13472_A7_0.fcs Sample_210419_13473_A8_0.fcs Sample_210419_13474_A9_0.fcs	4510000	4060000	Sample_210618_13955_C1_0.fcs Sample_210618_13956_C2_0.fcs Sample_210618_13957_C3_0.fcs	1:1
055	56	2	7.9	2.31003e+06	4.22492e+06	1:3	Sample_210419_13477_B1_0.fcs Sample_210419_13478_B2_0.fcs Sample_210419_13479_B3_0.fcs	3580000	4800000	Sample_210618_13958_C4_0.fcs Sample_210618_13959_C5_0.fcs Sample_210618_13960_C6_0.fcs	1:1
056	61	2	6.6	1.62107e+06	4.22492e+06	1:3	Sample_210419_13480_B4_0.fcs Sample_210419_13481_B5_0.fcs Sample_210419_13482_B6_0.fcs	3070000	3390000	Sample_210618_13961_C7_0.fcs Sample_210618_13962_C8_0.fcs Sample_210618_13963_C9_0.fcs	1:1
057	60	2	9.7	2.79635e+06	3.37386e+06	1:3	Sample_210419_13483_B7_0.fcs Sample_210419_13484_B8_0.fcs Sample_210419_13485_B9_0.fcs	2780000	2490000	Sample_210618_13966_D1_0.fcs Sample_210618_13967_D2_0.fcs Sample_210618_13968_D3_0.fcs	1:1
058	80	2	4.6	1.82371e+06	3.64742e+06	1:3	Sample_210419_13488_C1_0.fcs Sample_210419_13489_C2_0.fcs Sample_210419_13490_C3_0.fcs	9550000	11100000	Sample_210618_13969_D4_0.fcs Sample_210618_13970_D5_0.fcs Sample_210618_13971_D6_0.fcs	1:1
059	70	3	7	5.91692e+06	3.7386e+06	1:3	Sample_210419_13491_C4_0.fcs Sample_210419_13492_C5_0.fcs Sample_210419_13493_C6_0.fcs	4850000	5840000	Sample_210618_13972_D7_0.fcs Sample_210618_13973_D8_0.fcs Sample_210618_13974_D9_0.fcs	1:1
060	65	2	4	5.48463e+06	3.67781e+06	1:3	Sample_210419_13494_C7_0.fcs Sample_210419_13495_C8_0.fcs Sample_210419_13496_C9_0.fcs	15900000	14100000	Sample_210618_13977_E1_0.fcs Sample_210618_13978_E2_0.fcs Sample_210618_13979_E3_0.fcs	1:1
062	72	2	6.8	1.86424e+06	3.89058e+06	1:3	Sample_210419_13502_D4_0.fcs Sample_210419_13503_D5_0.fcs Sample_210419_13504_D6_0.fcs	15400000	8010000	Sample_210618_13983_E7_0.fcs Sample_210618_13984_E8_0.fcs Sample_210618_13985_E9_0.fcs	1:1
063	61	2	3.9	4.13374e+06	4.74164e+06	1:3	Sample_210419_13505_D7_0.fcs Sample_210419_13506_D8_0.fcs Sample_210419_13507_D9_0.fcs	16800000	9720000	Sample_210618_13988_F1_0.fcs Sample_210618_13989_F2_0.fcs Sample_210618_13990_F3_0.fcs	1:1
064	69	8	18.5	5.87639e+06	8.51064e+06	1:3	Sample_210419_13510_E1_0.fcs Sample_210419_13511_E2_0.fcs Sample_210419_13512_E3_0.fcs	21100000	11900000	Sample_210618_13991_F4_0.fcs Sample_210618_13992_F5_0.fcs Sample_210618_13993_F6_0.fcs	1:1
066	58	1	5.5	3.24215e+06	4.40729e+06	1:3	Sample_210419_13516_E7_0.fcs Sample_210419_13517_E8_0.fcs Sample_210419_13518_E9_0.fcs	5540000	4630000	Sample_210618_13999_G1_0.fcs Sample_210618_14000_G2_0.fcs Sample_210618_14001_G3_0.fcs	1:1
067	60	1	4.8	2.24249e+06	3.06991e+06	1:3	Sample_210419_13522_F1_0.fcs Sample_210419_13523_F2_0.fcs Sample_210419_13524_F3_0.fcs	9810000	5810000	Sample_210618_14002_G4_0.fcs Sample_210618_14003_G5_0.fcs Sample_210618_14004_G6_0.fcs	1:1
069	66	6	7.5	2.91793e+06	5.10638e+06	1:3	Sample_210419_13528_F7_0.fcs Sample_210419_13529_F8_0.fcs Sample_210419_13530_F9_0.fcs	6180000	5560000	Sample_210618_14010_H1_0.fcs Sample_210618_14011_H2_0.fcs Sample_210618_14012_H3_0.fcs	1:1
071	70	2	5.4	6.4843e+06	4.95441e+06	1:3	Sample_210419_13533_G1_0.fcs Sample_210419_13534_G2_0.fcs Sample_210419_13535_G3_0.fcs	16400000	13000000	Sample_210618_14016_H7_0.fcs Sample_210618_14017_H8_0.fcs Sample_210618_14018_H9_0.fcs	1:1
072	63	2	5.1	1.78318e+06	4.25532e+06	1:3	Sample_210419_13536_G4_0.fcs Sample_210419_13537_G5_0.fcs Sample_210419_13538_G6_0.fcs	36900000	21600000	Sample_210621_13949_A1_0.fcs Sample_210621_13950_A2_0.fcs Sample_210621_13951_A3_0.fcs	1:1
073	73	2	5.5	1.09422e+06	1.86322e+06	1:3	Sample_210419_13539_G7_0.fcs Sample_210419_13540_G8_0.fcs Sample_210419_13541_G9_0.fcs	9370000	9630000	Sample_210621_13952_A4_0.fcs Sample_210621_13953_A5_0.fcs Sample_210621_13954_A6_0.fcs	1:1
074	86	1	5.6	1.90476e+06	4.16413e+06	1:3	Sample_210419_13544_H1_0.fcs Sample_210419_13545_H2_0.fcs Sample_210419_13546_H3_0.fcs	2910000	6620000	Sample_210621_13955_A7_0.fcs Sample_210621_13956_A8_0.fcs Sample_210621_13957_A9_0.fcs	1:1
075	76	2	3.5	4.74164e+06	6.29179e+06	1:3	Sample_210419_13547_H4_0.fcs Sample_210419_13546_H5_0.fcs Sample_210419_13549_H6_0.fcs	6520000	6540000	Sample_210621_13960_B1_0.fcs Sample_210621_13961_B2_0.fcs Sample_210621_13962_B3_0.fcs	1:1
076	76	2	7.5	1.18879e+07	6.65653e+06	1:3	Sample_210419_13550_H7_0.fcs Sample_210419_13551_H8_0.fcs Sample_210419_13552_H9_0.fcs	2480000	6350000	Sample_210621_13963_B4_0.fcs Sample_210621_13964_B5_0.fcs Sample_210621_13965_B6_0.fcs	1:1
077	66	1	5.6	1.6616e+06	5.68389e+06	1:3	Sample_210420_13475_A1_0 Sample_210420_13476_A2_0.fcs Sample_210420_13477_A3_0.fcs	7810000	16100000	Sample_210621_13971_C1_0.fcs Sample_210621_13972_C2_0.fcs Sample_210621_13973_C3_0.fcs	1:1
079	60	2	6.1	4.57953e+06	8.23708e+06	1:3	Sample_210420_13481_A7_0.fcs Sample_210420_13482_A8_0.fcs Sample_210420_13483_A9_0.fcs	16300000	19700000	"Sample_210621_13974_C4_0.fcs Sample_210621_13975_C5_0.fcs Sample_210621_13976_C6_0.fcs"	1:1
080	50	2	5.2	2.14792e+06	5.80547e+06	1:3	Sample_210420_13486_B1_0.fcs Sample_210420_13487_B2_0.fcs Sample_210420_13488_B3_0.fcs	9320000	28800000	"Sample_210621_13977_C7_0.fcs Sample_210621_13978_C8_0.fcs Sample_210621_13979_C9_0.fcs"	1:1
081	63	1	10.5	6.88956e+06	1.24316e+07	1:3	Sample_210420_13489_B4_0.fcs Sample_210420_13490_B5_0.fcs Sample_210420_13491_B6_0.fcs	2380000	6250000	"Sample_210621_13982_D1_0.fcs Sample_210621_13983_D2_0.fcs Sample_210621_13984_D3_0.fcs"	1:1
082	51	3	1.4	1.42925e+07	1.49544e+07	1:3	Sample_210420_13492_B7_0.fcs Sample_210420_13493_B8_0.fcs Sample_210420_13494_B9_0.fcs	26500000	26200000	"Sample_210621_13988_D7_0.fcs Sample_210621_13989_D8_0.fcs Sample_210621_13990_D9_0.fcs"	1:1
084	69	3	3.4	4.70111e+06	9.63526e+06	1:3	Sample_210420_13500_C4_0.fcs Sample_210420_13501_C5_0.fcs Sample_210420_13502_C6_0.fcs	5240000	13300000	"Sample_210621_13999_E7_0.fcs Sample_210621_14000_E8_0.fcs Sample_210621_14001_E9_0.fcs"	1:1
087	68	6	29	3.86356e+06	1.04863e+07	1:3	Sample_210420_13511_D4_0.fcs Sample_210420_13512_D5_0.fcs Sample_210420_13513_D6_0.fcs	4720000	20500000	"Sample_210621_14007_F4_0.fcs Sample_210621_14008_F5_0.fcs Sample_210621_14009_F6_0.fcs"	1:1
089	59	6	9.3	9.8075e+06	1.19453e+07	1:3	Sample_210420_13519_E1_0.fcs Sample_210420_13520_E2_0.fcs Sample_210420_13521_E3_0.fcs	4930000	7310000	"Sample_210621_14018_G4_0.fcs Sample_210621_14019_G5_0.fcs Sample_210621_14020_G6_0.fcs"	1:1
092	61	1	3.4	5.06586e+06	6.68693e+06	1:3	Sample_210420_13530_F1_0.fcs Sample_210420_13531_F2_0.fcs Sample_210420_13532_F3_0.fcs	5460000	9010000	"Sample_210621_14021_G7_0.fcs Sample_210621_14022_G8_0.fcs Sample_210621_14023_G9_0.fcs"	1:1
093	56	3	7.3	5.63323e+06	1.19453e+07	1:3	Sample_210420_13533_F4_0.fcs Sample_210420_13534_F5_0.fcs Sample_210420_13535_F6_0.fcs	10100000	12400000	"Sample_210621_14026_H1_0.fcs Sample_210621_14027_H2_0.fcs Sample_210621_14028_H3_0.fcs"	1:1
094	73	2	2	1.04154e+07	1.15805e+07	1:3	Sample_210420_13536_F7_0.fcs Sample_210420_13537_F8_0.fcs Sample_210420_13538_F9_0.fcs	12400000	12900000	Sample_210621_14029_H4_0.fcs Sample_210621_14030_H5_0.fcs Sample_210621_14031_H6_0.fcs	1:1
095	72	3	8.8	9.76697e+06	1.16413e+07	1:3	Sample_210420_13541_G1_0.fcs Sample_210420_13542_G2_0.fcs Sample_210420_13543_G3_0.fcs	10400000	26200000	Sample_210621_14032_H7_0.fcs Sample_210621_14033_H8_0.fcs Sample_210621_14034_H9_0.fcs	1:1
098	61	2	5.3	1.17528e+06	5.71429e+06	1:3	Sample_210420_13552_H1_0.fcs Sample_210420_13553_H2_0.fcs Sample_210420_13554_H3_0.fcs	2740000	3720000	Sample_210621_13955_A7_0.fcs Sample_210621_13956_A8_0.fcs Sample_210621_13957_A9_0.fcs	1:1
101	73	2	10.3	1.25633e+06	6.07903e+06	1:3	Sample_210421_13481_A1_0.fcs Sample_210421_13482_A2_0.fcs Sample_210421_13483_A3_0.fcs	15200000	12400000	Sample_210621_13966_B7_0.fcs Sample_210621_13967_B8_0.fcs Sample_210621_13968_B9_0.fcs	1:1
103	71	6	5.9	1.45897e+06	3.769e+06	1:3	Sample_210421_13487_A7_0.fcs Sample_210421_13488_A8_0.fcs Sample_210421_13489_A9_0.fcs	80800000	45800000	Sample_210621_13974_C4_0.fcs Sample_210621_13975_C5_0.fcs Sample_210621_13976_C6_0.fcs	1:1
104	67	1	16.2	851064	3.49544e+06	1:3	Sample_210421_13492_B1_0.fcs Sample_210421_13493_B2_0.fcs Sample_210421_13494_B3_0.fcs	15100000	5250000	Sample_210621_13977_C7_0.fcs Sample_210621_13978_C8_0.fcs Sample_210621_13979_C9_0.fcs	1:1
105	66	1	5	1.82371e+06	4.58967e+06	1:3	Sample_210421_13495_B4_0.fcs Sample_210421_13496_B5_0.fcs Sample_210421_13497_B6_0.fcs	29400000	28000000	Sample_210621_13982_D1_0.fcs Sample_210621_13983_D2_0.fcs Sample_210621_13984_D3_0.fcs	1:1
106	57	1	6.2	6.28166e+06	6.59574e+06	1:3	Sample_210421_13498_B7_0.fcs Sample_210421_13499_B8_0.fcs Sample_210421_13500_B9_0.fcs	34900000	37000000	Sample_210621_13985_D4_0.fcs Sample_210621_13986_D5_0.fcs Sample_210621_13987_D6_0.fcs	1:1
107	52	2	6.7	2.51266e+06	5.0152e+06	1:3	Sample_210421_13503_C1_0.fcs Sample_210421_13504_C2_0.fcs Sample_210421_13505_C3_0.fcs	1550000	9710000	Sample_210621_13988_D7_0.fcs Sample_210621_13989_D8_0.fcs Sample_210621_13990_D9_0.fcs	1:1
109	73	1	7.6	3.28267e+06	5.98784e+06	1:3	Sample_210421_13509_C7_0.fcs Sample_210421_13510_C8_0.fcs Sample_210421_13511_C9_0.fcs	4480000	4890000	Sample_210621_13996_E4_0.fcs Sample_210621_13997_E5_0.fcs Sample_210621_13998_E6_0.fcs	1:1
111	59	1	4.7	7.94326e+06	4.62006e+06	1:3	Sample_210421_13514_D1_0.fcs Sample_210421_13515_D2_0.fcs Sample_210421_13516_D3_0.fcs	2450000	6230000	"Sample_210621_14004_F1_0.fcs Sample_210621_14005_F2_0.fcs Sample_210621_14006_F3_0.fcs"	1:1
113	65	3	8.5	9.45626e+06	4.40729e+06	1:3	Sample_210421_13520_D7_0.fcs Sample_210421_13521_D8_0.fcs Sample_210421_13522_D9_0.fcs	3030000	5070000	Sample_210621_14010_F7_0.fcs Sample_210621_14011_F8_0.fcs Sample_210621_14012_F9_0.fcs	1:1
114	62	2	5.4	3.12057e+06	4.9848e+06	1:3	Sample_210421_13525_E1_0.fcs Sample_210421_13526_E2_0.fcs Sample_210421_13527_E3_0.fcs	28600000	23300000	Sample_210621_14015_G1_0.fcs Sample_210621_14016_G2_0.fcs Sample_210621_14017_G3_0.fcs	1:1
116	62	2	9.4	3.89058e+06	6.20061e+06	1:3	Sample_210421_13531_E7_0.fcs Sample_210421_13532_E8_0.fcs Sample_210421_13533_E9_0.fcs	11500000	14100000	Sample_210621_14021_G7_0.fcs Sample_210621_14022_G8_0.fcs Sample_210621_14023_G9_0.fcs	1:1
117	79	2	6.5	1.69807e+07	6.8693e+06	1:3	Sample_210421_13536_F1_0.fcs Sample_210421_13537_F2_0.fcs Sample_210421_13538_F3_0.fcs	33300000	14900000	Sample_210621_14026_H1_0.fcs Sample_210621_14027_H2_0.fcs Sample_210621_14028_H3_0.fcs	1:1
118	68	2	4.2	1.41844e+06	4.46809e+06	1:3	Sample_210421_13539_F4_0.fcs Sample_210421_13540_F5_0.fcs Sample_210421_13541_F6_0.fcs	22400000	12000000	Sample_210621_14029_H4_0.fcs Sample_210621_14030_H5_0.fcs Sample_210621_14031_H6_0.fcs	1:1
119	61	1	5.9	3.3232e+06	3.67781e+06	1:3	Sample_210421_13542_F7_0.fcs Sample_210421_13543_F8_0.fcs Sample_210421_13544_F9_0.fcs	3930000	11000000	Sample_210621_14032_H7_0.fcs Sample_210621_14033_H8_0.fcs Sample_210621_14034_H9_0.fcs	1:1
120	57	1	18.9	1.49949e+06	2.43161e+06	1:3	Sample_210421_13547_G1_0.fcs Sample_210421_13548_G2_0.fcs Sample_210421_13549_G3_0.fcs	3070000	1440000	U120_1_A4_0.fcs U120_2_A5_0.fcs U120_3_A6_0.fcs	1:1
121	66	4	3.7	5.26849e+06	3.52584e+06	1:3	Sample_210421_13550_G4_0.fcs Sample_210421_13551_G5_0.fcs Sample_210421_13552_G6_0.fcs	907000	1610000	Sample_210617_13944_C4_0.fcs Sample_210617_13945_C5_0.fcs Sample_210617_13946_C6_0.fcs	1:1
122	64	1	15.4	4.45795e+06	2.83587e+06	1:3	Sample_210421_13553_G7_0.fcs Sample_210421_13554_G8_0.fcs Sample_210421_13555_G9_0.fcs	15400000	12400000	Sample_210618_14013_H4_0.fcs Sample_210618_14014_H5_0.fcs Sample_210618_14015_H6_0.fcs	1:1
124	63	1	4.3	5.02533e+06	4.40729e+06	1:3	Sample_210421_13561_H4_0.fcs Sample_210421_13562_H5_0.fcs Sample_210421_13563_H6_0.fcs	3960000	112000000	Sample_210621_13999_E7_0.fcs Sample_210621_14000_E8_0.fcs Sample_210621_14001_E9_0.fcs	1:1

## Sheet: IRB21-004451
			Plasma Sample Data
Patient ID	Age at Visit	PSA at Visit 1 (ng/mL)	Plasma PSMA EV Concentration (EVs/mL)	Plasma STEAP1 EV Concentration (EVs/mL)	Related FCS File	Pre-staining Sample Dilution Factor
001	55	6.3	8400000	222400000	Sample_210908_14924_A1_0.fcs Sample_210908_14925_A2_0.fcs Sample_210908_14926_A3_0.fcs	01:10:00
002	66	3.2	6800000	6.83556e+07	Sample_210908_14927_A4_0.fcs Sample_210908_14928_A5_0.fcs Sample_210908_14926_A6_0.fcs	01:10:00
003	76	11.3	1.29333e+07	6.89778e+07	Sample_210908_14930_A7_0.fcs Sample_210908_14931_A8_0.fcs Sample_210908_14932_A9_0.fcs	01:10:00
004	55	8.2	6800000	6.57333e+07	Sample_210908_14938_B1_0.fcs Sample_210908_14939_B2_0.fcs Sample_210908_14940_B3_0.fcs	01:10:00
005	66	9.3	2800000	6.57333e+07	Sample_210910_14967_A3_0.fcs Sample_210910_14968_A4_0.fcs Sample_210910_14969_A5_0.fcs	01:20:00
006	76	9	3.09333e+07	2.77333e+08	Sample_210908_14944_B7_0.fcs Sample_210908_14945_B8_0.fcs Sample_210908_14946_B9_0.fcs	01:10:00
007	66	2.8	6.66667e+06	520000000	Sample_210908_14952_C1_0.fcs Sample_210908_14953_C2_0.fcs Sample_210908_14954_C3_0.fcs	01:10:00
008	76	117	1.29333e+07	1.48444e+08	Sample_210908_14958_C7_0.fcs Sample_210908_14959_C8_0.fcs Sample_210908_14960_C9_0.fcs	01:10:00
009	55	5.6	1.73333e+06	170000000	Sample_210908_14961_C10_0.fcs Sample_210908_14962_C11_0.fcs Sample_210908_14963_C12_0.fcs	01:10:00
010	76	5.1	8.26667e+06	75200000	Sample_210908_14966_D1_0.fcs Sample_210908_14967_D2_0.fcs Sample_210908_14968_D3_0.fcs	01:10:00
011	76	1.8	8.53333e+06	5.90667e+07	Sample_210908_14983_E4_0.fcs Sample_210908_14984_E5_0.fcs Sample_210908_14985_E6_0.fcs	01:10:00
012	76	15.6	8400000	94800000	Sample_210908_14986_E7_0.fcs Sample_210908_14987_E8_0.fcs Sample_210908_14988_E9_0.fcs	01:10:00
013	55	80.7	1.46667e+07	9.61333e+07	Sample_210908_14989_E10_0.fcs Sample_210908_14990_E11_0.fcs Sample_210908_14991_E12_0.fcs	01:10:00
014	66	11.9	6.26667e+06	38400000	Sample_210908_14997_F4_0.fcs Sample_210908_14998_F5_0.fcs Sample_210908_14999_F6_0.fcs	01:10:00
015	76	0.88	1.22667e+07	1.35333e+08	Sample_210908_15011_G4_0.fcs Sample_210908_15012_G5_0.fcs Sample_210908_15013_G6_0.fcs	01:10:00
016	76	68.7	1.01333e+07	91600000	Sample_210908_15025_H4_0.fcs Sample_210908_15026_H5_0.fcs Sample_210908_15027_H6_0.fcs	01:10:00
017	66	45.6	12400000	1.55467e+08	Sample_210909_14938_A6_0.fcs Sample_210909_14939_A7_0.fcs Sample_210909_14940_A8_0.fcs	01:10:00
018	66	4.21	9600000	96400000	Sample_210910_14981_B4_0.fcs Sample_210910_14982_B5_0.fcs Sample_210910_14983_B6_0.fcs	01:20:00
019	66	8.8	4800000	1.10533e+08	Sample_210909_14949_B4_0.fcs Sample_210909_14950_B5_0.fcs Sample_210909_14951_B6_0.fcs	01:10:00
020	66	88.1	5.33333e+06	57200000	Sample_210910_14989_A9_0.fcs Sample_210910_14990_A10_0.fcs Sample_210910_14991_A11_0.fcs	01:40:00
