# Supplementary material for: Calibration and standardization of extracellular vesicle measurements by flow cytometry for translational prostate cancer research
Source: Royal Society of Chemistry journal article supplement (doi:10.1039/d2nr01160c), 2022-01-01
Supplement: d2nr01160c5.xlsx [file d2nr01160c5.xlsx]

## Sheet: Sheet1
Framework Criteria	What to report	Please complete each criterion
1.1 Preanalytical variables conforming to MISEV guidelines.	Preanalytical variables relating to EV sample including source, collection, isolation, storage, and any others relevant and available in the performed study.	Blood and urine samples were collected from localized prostate cancer patients and benign individuals. Demographics and clinicopathological characteristics can be found in Table S1. All samples were collected with approved Mayo Clinic IRB (19-006675, 21-004451). All urine samples are processed within 30 minutes post-collection. Blood samples are processed within 1 hour post-collection. Whole pati…
1.2 Experimental design according to MIFlowCyt guidelines.	EV-FC manuscripts should provide a brief description of the experimental aim, keywords, and variables for the performed FC experiment(s) using MIFlowCyt checklist criteria: 1.1, 1.2, and 1.3, respectively. Template found at www.evflowcytometry.org.	In this study, we described a systematic approach for standardization of acquisition parameters for side-scatter detection of EVs and other particles from cell-depleted plasma and urine. To fulfill the prerequisites of rigor and transparency established by the EV-FCM Working Group, we performed calibration of our flow cytometer and transformed side-scatter and fluorescence intensities in standard…
2.1 Sample staining details	State any steps relating to the staining of samples. Along with the method used for staining, provide relevant reagent descriptions as listed in MIFlowCyt guidelines (Section 2.4 Fluorescence Reagent(s) Descriptions).	10 mL of PSMA-AF647 and STEAP1-AF488 antibodies with desired concentrations (6mg/mL final concentration for both antibodies) were plated to a well of 96-well V-plate, then 10 mL of pre-diluted plasma or urine samples were added to the antibody mixture, which makes a total volume of 30 mL. The antibody-biofluid mixture was incubated in dark for 30 minutes at room temperature to label prostate spec…
2.2 Sample washing details	State any steps relating to the washing of samples.	We do not have sample washing steps.
2.3 Sample dilution details	All methods and steps relating to sample dilution.	All patient plasma samples (10uL) were diluted to PBS at different ratio to identify optimal dilution factor before staining.
3.1 Buffer alone controls.	State whether a buffer-only control was analyzed at the same settings and during the same experiment as the samples of interest. If utilized it is recommended that all samples be recorded for a consistent set period of time e.g. 5 minutes, rather than stopping analysis at a set recorded event count e.g. 100,000 events. This allows comparisons of total particle counts between controls and samples.	PBS (buffer) only control was run with similar settings and was included in all experiments at the settings and during all experiments. All samples were run for a fixed time of 1 minute. Buffer only had a count <80 events per second
3.2 Buffer with reagent controls.	State whether a buffer with reagent control was analyzed at the same settings, same concentrations, and during the same experiment as the samples of interest. If used state what the results were.	Antibody buffer only control was run with similar settings and was included in all experiments at the settings and during all experiments. All samples were run for a fixed time of 1 minute. Buffer with antibodies had a count <80 events per second
3.3 Unstained controls.	State whether unstained control samples were analyzed at the same settings and during the same experiment as stained samples. If used, state what the results were, preferably in standard units.	We ran unstained plasma samples at the same settings during all experiments as we have shown in Figure S8B.
3.4 Isotype controls.	The use of isotype controls is applicable to immunofluorescence labelling only. State whether isotype controls were analyzed at the same settings and during the same experiment as stained samples. If utilized, state which antibody they are matched to, the concentration used, and what the results were (Section 4.2, 4.3, 4.4). Due to conjugation differences between manufacturers if should be stated…	We tested each antibody-matched isotype labeled similarly to antibodies. Each isotype control was analyzed at the same settings and during all experiments as stained samples. Isotypes of anti-PSMA and STEAP1 antibodies had 6ug/mL of final concentrations. Degrees of labeling for anti-PSMA and STEAP1 antibody were 3.3 and 3.2 respectively. Isotype controls did not show any positive events.
3.5 Single-stained controls.	State whether single-stained controls were included. If used state whether the single-stained controls were recorded using the same settings, dilutions, and during the same experiment as stained samples and state what the results were, preferably in standard units (Section 4.2, 4.3, 4.4).	We did not include any single-stained controls.
3.6 Procedural controls.	State whether procedural controls were included. If used, state the procedure and if the procedural controls were acquired at the same settings and during the same experiment as stained samples.	We did not include any procedural controls.
3.7 Serial dilutions.	State whether serial dilutions were performed on samples and note the dilution range and manner of testing. The fluorescence and/or scatter signal intensity would ideally be reported in standard units (see Section 4.3, 4.4) but arbitrary units can also be used. This data is best reported by plotting the recorded number events/concentration over a set period of time at different sample dilution. T…	We performed serial dilutions on both plasma and urine samples to find optimal pre-staining sample dilution factor shown in Figure 1.
3.8. Detergent treated EV-samples	State whether samples were detergent treated to assess lability. If utilized, state what detergent was used, the end concentration of the detergent, and what the results were of the lysis.	We provided detergent treated EV sample in Figures S9A and B. We used 0.1%SDS for 30 minutes at room temperature and in the dark. Detergent treatment led to reduction in 98.7% of recombinant Gag-GFP+ EVs.
4.1 Trigger Channel(s) and Threshold(s).	The trigger channel(s) and threshold(s) used for event detection. Preferably, the fluorescence calibration (Section 4.3) and/or scatter calibration (Section 4.4) should be used in order to report the trigger channel(s) and threshold(s) in standardized units.	We used triggering threshold on side scatter (LALS) only because of the higher sensitivity for small particles. It was set at 2300 arbitrary units which corresponds to a scattering cross section of 19 nm^2 and an EV diameter of 188 nm, given the assumed refractive index distribution of an EV by Mie theory modeling (Line 425). The upper limit is 4.1 x 10^6 arbitrary units corresponds to a scatteri…
4.2 Flow Rate / Volumetric quantification.	State if the flow rate was quantified/validated and if so, report the result and how they were obtained.	We determined optimal flow rate for both plasma and urine analysis as shown in Figure 4. Plasma samples were analyzed at 0.75 ul/min and urine samples at 1.5 ul/min
4.3 Fluorescence Calibration.	State whether fluorescence calibration was implemented, and if so, report the materials and methods used, catalogue numbers, lot numbers, and supplied reference units for the standards. Fluorescence parameters may be reported in standardized units of MESF, ERF, or ABC beads. The type of regression used, and the resulting scatter plot of arbitrary data vs standard data for the reference particles …	MESF reference values for each population of Alexa fluor 488 (AF488) and 647 (AF647) beads, along with acquired channel statistics for each population were log-transformed before performing linear regression (QuantumTM Alexa Fluor488 MESF and Alexa Fluor647 MESF, Bangs Laboratories Inc., Fishers, Indiana). Log transformed raw data was then converted to MESF untis using the obtained slope and inte…
4.4 Light Scatter Calibration.	State whether and how light scatter calibration was implemented. Light scatter parameters may be reported in standardized units of nm2, along with information required to reproduce the model.	Side scatter was calibrated with Rosetta Calibration beads (#Cal002, Exometry, The Netherlands) and Rosetta Calibration software (purchased license from Exometry, The Netherlands) according to manufacturer’s instructions (Exometry, The Netherlands). Briefly, a mixture of polystyrene beads of known size and refractive index was analyzed and side scatter intensities in arbitrary units were converte…
5.1 EV diameter/surface area/volume approximation.	State whether and how EV diameter, surface area, and/or volume has been calculated using FC measurements.	To estimate the size of an extracellular vesicle, we assumed that polystyrene beads have a refractive index of 1.633 and double distilled water as sheath fluid has a refractive index of 1.343 at an illumination wavelength of 405 nm. For EVs, we assumed a core refractive index of 1.38, a shell refractive index of 1.48 and a shell thickness of 4 nm.
5.2 EV refractive index approximation.	State whether the EV refractive index has been approximated and how this was done.	We determined the diameter and refractive index of each particle detected by flow cytometry using the Flow-Scatter Ratio (Flow-SR). Briefly .fcs files were imported into Exometry software to convert side scatter intensities into diameter. Then, files were transferred to the Flow-SR software to measure levels of particles below and above refractive index of 1.45.
5.3 EV epitope number approximation.	State whether EV epitope number has been approximated, and if so, how it was approximated.	EV epitope number was not approximated in this manuscript.
6.1 Completion of MIFlowCyt checklist.	Complete MIFlowCyt checklist criteria 1 to 4 using the MIFlowCyt guidelines. Template found at www.evflowcytometry.org.	We completed MIFlowCyt Checklist and attached to the manuscript.
6.2 Calibrated channel detection range	If fluorescence or scatter calibration has been carried out, authors should state whether the upper and lower limits of a calibrated detection channel were calculated in standardized units. This can be done by converting the arbitrary unit scale to a calibrated scaled, as discussed in Section 4.3 and 4.4, and providing the highest unit on this scale and the lowest detectable unit above the unstai…	We used triggering threshold on side scatter (LALS) only because of the higher sensitivity for small particles. It was set at 2300 arbitrary units which corresponds to a scattering cross section of 19 nm2 and an EV diameter of 188 nm, given the assumed refractive index distribution of an EV by Mie theory modeling (Line 425). The upper limit is 4.1 x 106 arbitrary units corresponds to a scattering…
6.3 EV number/concentration.	State whether EV number/concentration has been reported. If calculated, it is preferable to report EV number/concentration in a standardized manner, stating the number/concentration between a set detection range.	The quantities of EVs have been reported as concentrations of EVs (EVs/mL).
6.4 EV brightness.	When applicable, state the method by which the brightness of EVs is reported in standardized units of scatter and/or fluorescence.	We calibrated fluorescence intensities by transforming arbitrary units into molecules of equivalent soluble fluorochrome (MESF).
7.1. Sharing of data to a public repository.	Provide a link to the experimental data in a public data repository.	Raw flow cytometry data files are available via Figshare https://figshare.com/projects/Kim_Y_et_al_2022_Calibration_and_Standardization_of_Extracellular_Vesicle_Measurements_by_Flow_Cytometry_for_Translational_Prostate_Cancer_Research/138135 For additional information, contact the corresponding author at lucien-matteoni.fabrice@mayo.edu
